# Supplementary material for: Bandgap engineering via boron and sulphur doped carbon modified anatase TiO2: a visible light stimulated photocatalyst for photo-fixation of N2 and TCH degradation
Source: Royal Society of Chemistry journal article supplement (doi:10.1039/d0na00183j), 2020-01-01
Supplement: d0na00183j1.pdf [file d0na00183j1.pdf]

**Bandgap engineering via Boron and Sulphur doped carbon modified Anatase TiO<sub>2</sub>: A  
Visible light stimulated Photocatalyst for Photo-Fixation of N<sub>2</sub> and TCH Degradation**

Centre for Nano Science and Nano Technology, Siksha 'O' Anusandhan Deemed to be University,  
Bhubaneswar 751 030, Odisha, India

\*Corresponding author

E-mail: [paridakulamani@yahoo.com](mailto:paridakulamani@yahoo.com) and

[kulamaniparida@soa.ac.in](mailto:kulamaniparida@soa.ac.in)

Telephone +91-674-2379425, Fax. +91-6 74-2581637.

---

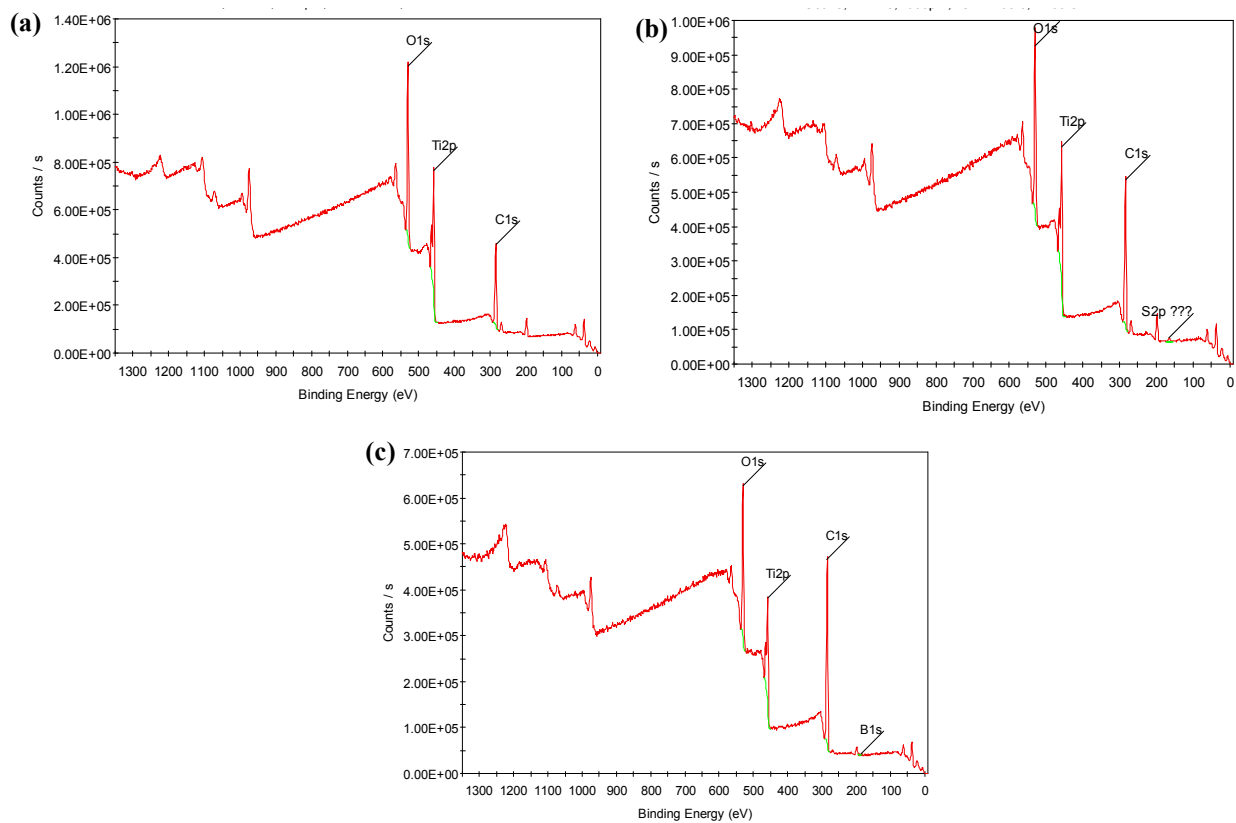

Figure. S1 XPS survey spectrum of (a) CT, (b) S-CT and (c) B-CT.

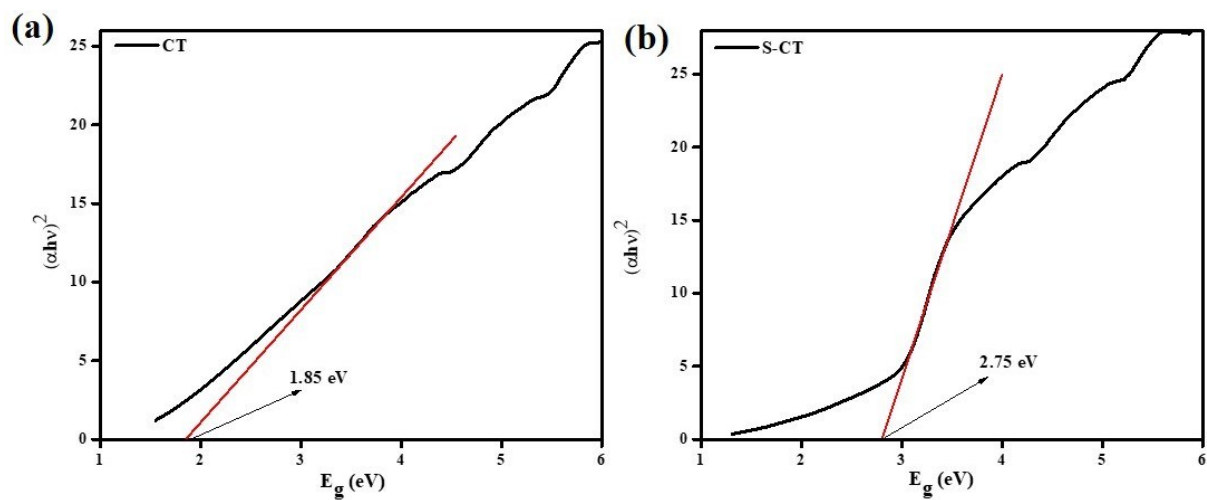

Figure. S2 Bandgap energy of (a) CT and (b) S-CT

## Urbach energy calculation

Following the mathematics  $\alpha = \alpha_0 \exp[E/E_u]$ , where  $\alpha$  stands for absorption coefficient,  $E$  as the energy of photon and  $E_u$  represents Urbach energy respectively. [1,2] As the absorption coefficient is equal to absorbance ( $A$  or  $F(R)$ ) for solid samples, so  $\alpha$  can be substituted by  $A$ .

[2] The Urbach energy was calculated by taking the reciprocal of the slope of the graph that is plotted between  $\ln A$  vs  $E$ .

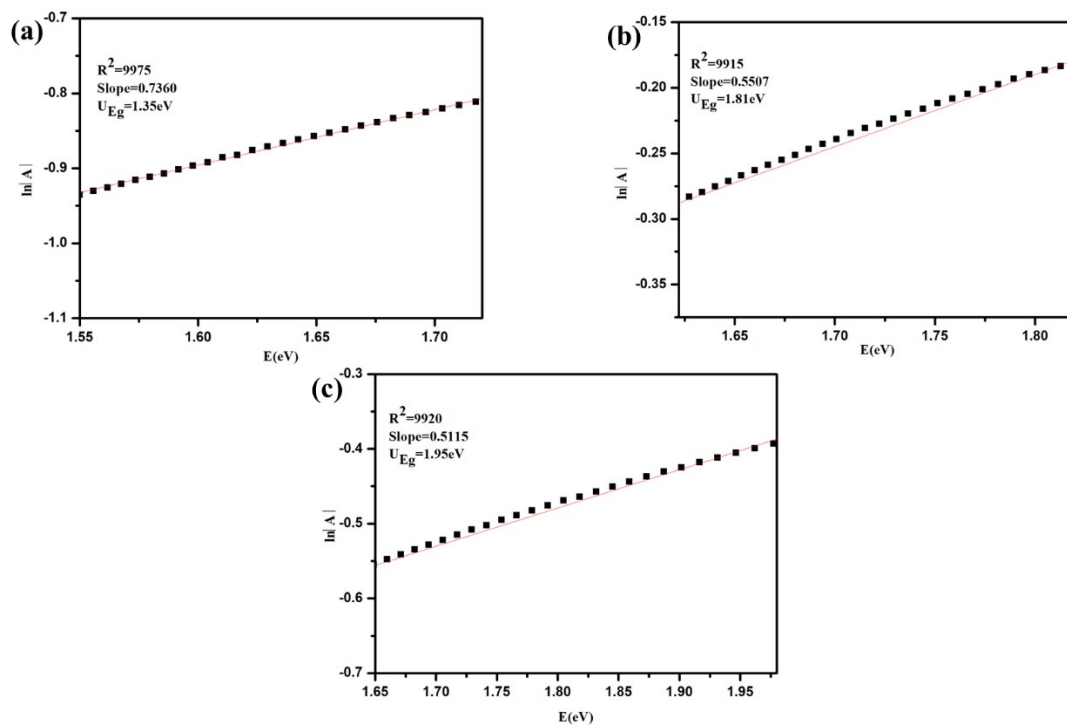

Figure. S3 Urbach energy (a) CT, (b) S-CT and (c) B-CT.

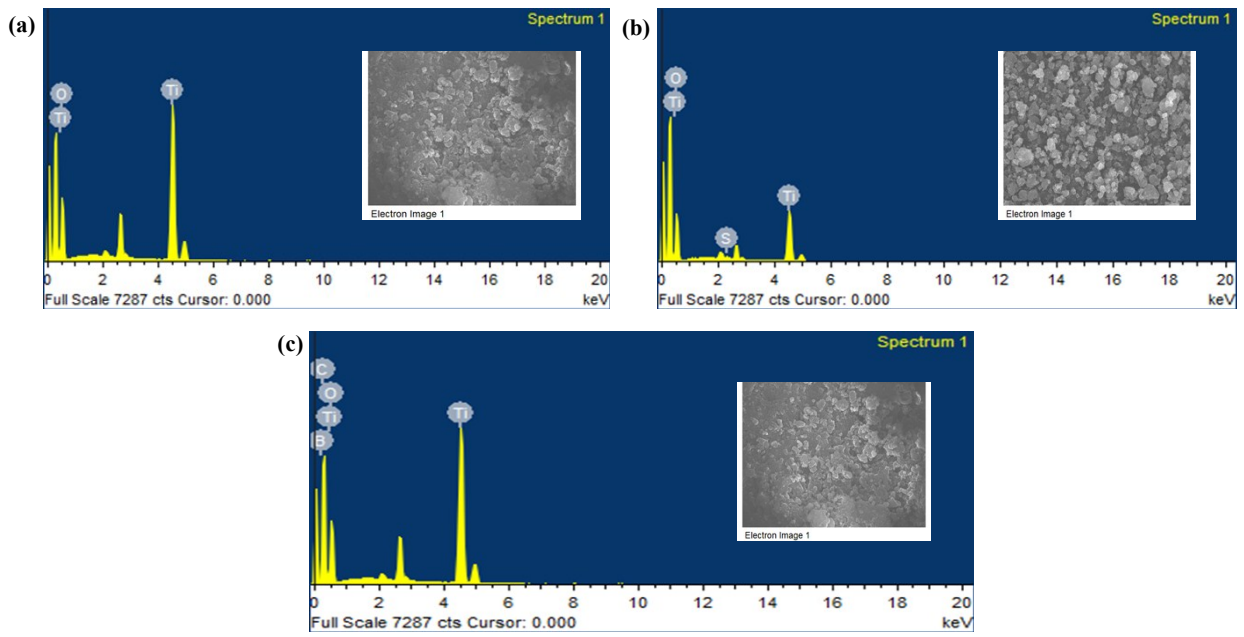

Figure. S4 EDX of (a) CT, (b) S-CT and (c) B-CT.

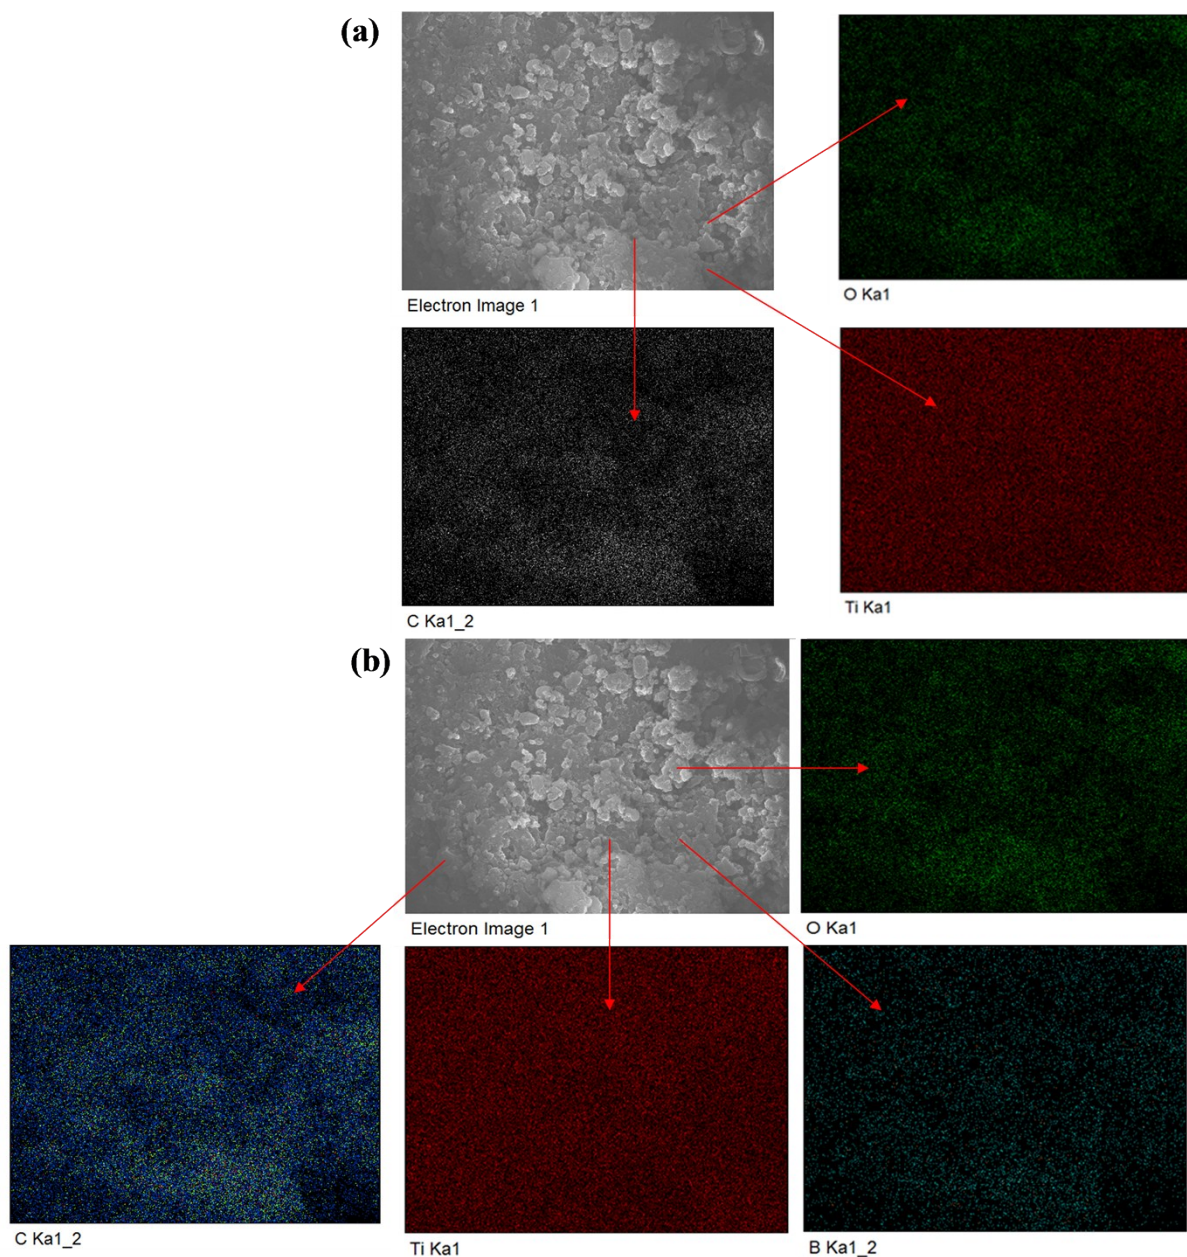

Figure. S5 Elemental colour mapping of (a) CT and (b) B-CT.

| Catalytic system                          | Antibiotic type        | Degradation% | Light source  | Time period | Reference |
|-------------------------------------------|------------------------|--------------|---------------|-------------|-----------|
| Au/B-TiO <sub>2</sub> /rGO                | 15ppm TCH              | 100          | 300W Xe lamp  | 60min       | 3         |
| Cu-TiO <sub>2</sub> @functionalized SWCNT | 30ppm sulfamethazine   | 100          | Open sunlight | 180min      | 4         |
| Al-doped TiO <sub>2</sub>                 | (2*10 <sup>-4</sup> M) | 93           | (103800       | 120min      | 5         |

|                                                       |                                                         |     |                                                                              |                                                                         |              |
|-------------------------------------------------------|---------------------------------------------------------|-----|------------------------------------------------------------------------------|-------------------------------------------------------------------------|--------------|
| Nanoflakes                                            | Fluoroquinolone                                         |     | lux as per HTC LX102A lux meter                                              |                                                                         |              |
| Co-TNs/rGO                                            | 30ppm TCH                                               | 60  | Halogen, ECO OSRAM 500 W lamp                                                | 180min                                                                  | 6            |
| N-doped TiO <sub>2</sub>                              | 1.0 × 10 <sup>-2</sup> mol L <sup>-1</sup><br>cefazolin | 80  | 5 × 8W blacklight fluorescent lamps                                          | 30min                                                                   | 7            |
| Co-doped TiO <sub>2</sub>                             | 10ppm                                                   | >90 | Xe lamp                                                                      | 240 min of irradiation under UV-C and 300 min under visible irradiation | 8            |
| Carbon-sensitized and nitrogen-doped TiO <sub>2</sub> | 5ppm                                                    | 95  | LED flexible strip (SMD 5016 water research 45 (2011) 5015 - 5026 5050, 15W) | 5h                                                                      | 9            |
| Nitrogen-doped TiO <sub>2</sub> /diatomite            | 20ppm                                                   | 91  | 150W Xe lamp                                                                 | 90min                                                                   | 10           |
| B-CT                                                  | 10ppm                                                   | 95  | 250W Xe-lamp                                                                 | 60min                                                                   | Present work |

Table. T1 comparison table representing different doped TiO<sub>2</sub> towards antibiotic degradation.

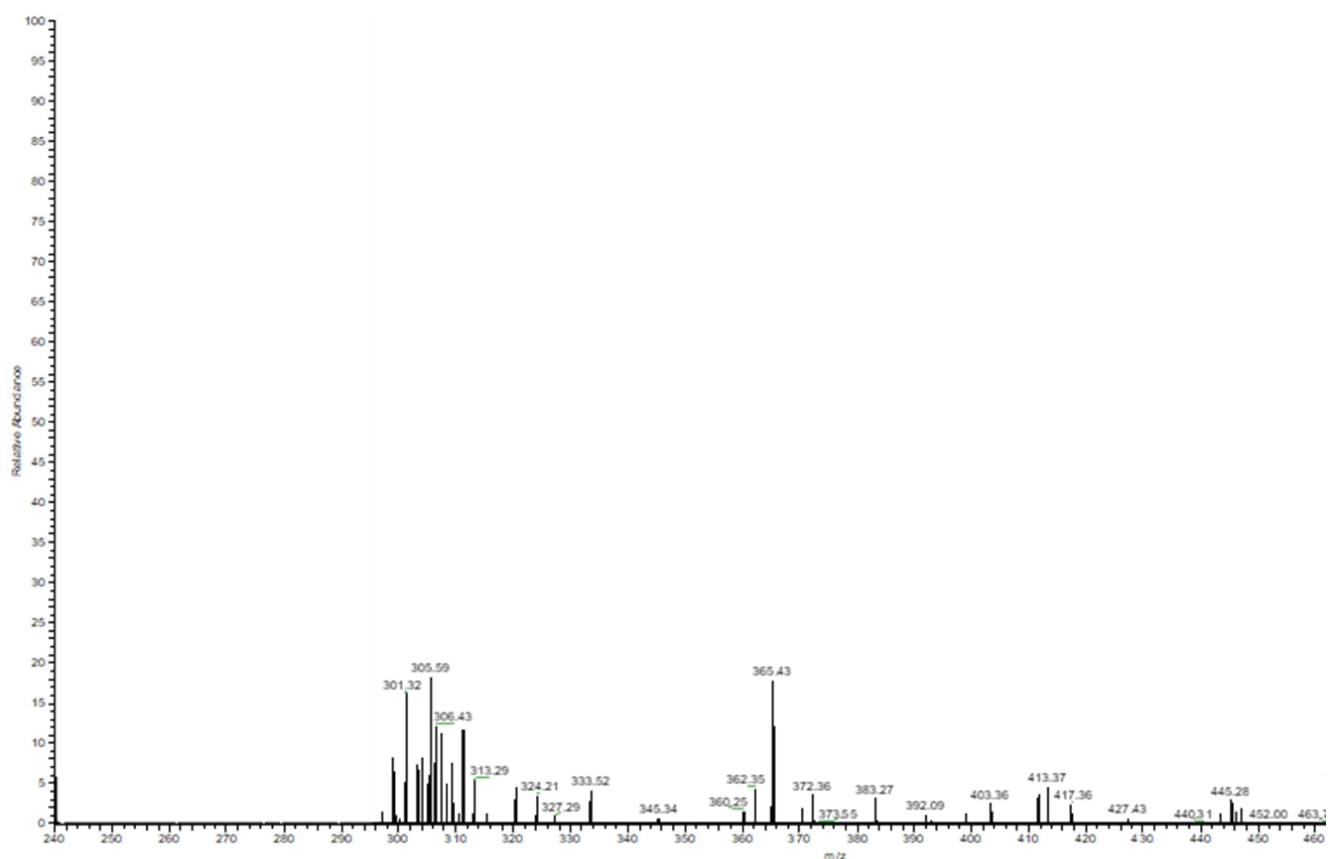

Figure. S6 LC-MS chromatogram of TCH over B-CT.

## References

1. Choudhury, B.; Chetri P.; Choudhury, A., Annealing temperature and oxygen vacancy dependent variation of lattice strain, band gap and luminescence properties of CeO<sub>2</sub> nanoparticles. *J. Exp. Nanosci.* **2015**, *10*,103-114.
2. Deng H.; Hossenlopp, J. M., Combined X-ray diffraction and diffuse reflectance analysis of nanocrystalline mixed Sn (II) and Sn (IV) oxide powders. J. M., *J. Phys. Chem. B*, **2005**, *109*, 66-73.
3. Vinesh, V.; Shaheer A.R.M.; Neppolian, B., Reduced graphene oxide (rGO) supported electron deficient B-doped TiO<sub>2</sub> (Au/B-TiO<sub>2</sub>/rGO) nanocomposite: An efficient visible light sonophotocatalyst for the degradation of Tetracycline (TC). *Ultrason. Sonochem.*, **2019**, *50*, 302-310.
4. Payan, A.; Isari A.A.; Gholizade, N.; Catalytic decomposition of sulfamethazine antibiotic and pharmaceutical wastewater using Cu-TiO<sub>2</sub>@ functionalized SWCNT

- ternary porous nanocomposite: Influential factors, mechanism, and pathway studies. *Chem. Eng. J.*, **2019**, *361*, 1121-1141.
5. Kaushik, R.; Samal, P.K.; Halder, A., Degradation of Fluoroquinolone-Based Pollutants and Bacterial Inactivation by Visible-Light-Active Aluminum-Doped TiO<sub>2</sub> Nanoflakes. *ACS Appl. Nano Mater.*, **2019**, *2*, 7898-7909.
  6. Alyani, S.J.; Pirbazari, A.E.; Khalilsaraei, F.E.; Kolar, N.A.; Gilani, N., Growing Co-doped TiO<sub>2</sub> nanosheets on reduced graphene oxide for efficient photocatalytic removal of tetracycline antibiotic from aqueous solution and modeling the process by artificial neural network. *J. Alloys Compd.*, **2019**, *799*, 169-182.
  7. Gurkan, Y.Y.; Turkten, N.; Hatipoglu, A.; Cinar, Z., Photocatalytic degradation of cefazolin over N-doped TiO<sub>2</sub> under UV and sunlight irradiation: Prediction of the reaction paths via conceptual DFT. *Chem. Eng. J.*, **2012**, *184*, 113-124.
  8. Çağlar Yılmaz, H.; Akgeyik, E.; Bougarrani, S.; El Azzouzi M.; Erdemoğlu, S., Photocatalytic degradation of amoxicillin using Co-doped TiO<sub>2</sub> synthesized by reflux method and monitoring of degradation products by LC–MS/MS. *J. Dispersion Sci. Technol.*, **2020**, *41*, 414- 425.
  9. Wang, P.; Zhou, T.; Wang R.; Lim, T.T., Carbon-sensitized and nitrogen-doped TiO<sub>2</sub> for photocatalytic degradation of sulfanilamide under visible-light irradiation. *Water Res.*, **2011**, *45*, 5015-5026.
  10. Chen Y.; Liu, K., Preparation and characterization of nitrogen-doped TiO<sub>2</sub>/diatomite integrated photocatalytic pellet for the adsorption-degradation of tetracycline hydrochloride using visible light. *Chem. Eng. J.*, **2016**, *302*, 682-696.
